## CORRECTION

# The melanocyte lineage in development and disease

**Richard L. Mort<sup>1</sup>, Ian J. Jackson<sup>1,3</sup> and E. Elizabeth Patton<sup>1,2</sup>**

<sup>1</sup>MRC Human Genetics Unit and <sup>2</sup>University of Edinburgh Cancer Research UK Cancer Centre, MRC Institute for Genetics and Molecular Medicine, University of Edinburgh, Edinburgh EH4 2XU, UK. <sup>3</sup>Roslin Institute, University of Edinburgh, Edinburgh EH25 9RG, UK.

There was an error published in *Development* **142**, 620-632.

The affiliations were incorrectly linked to the second and third authors. The authors appear with their correct affiliations above.

The authors apologise to readers for this mistake.
